## Real-time tracking and forecasting of the of COVID-19 outbreak in Kuwait: a mathematical modeling study

Abdullah A. Al-Shammari<sup>1,2\*</sup>, Hamad Ali<sup>2,3</sup>, Barrak Al-Ahmad<sup>4</sup>, Faisal H. Al-Refaei<sup>2</sup>, Salman Al-Sabah<sup>5,6</sup>, Mohammad H. Jamal<sup>5,6</sup>, Abdullah Alshukry<sup>7</sup>, Qais Al-Duwairi<sup>2</sup> and Fahd Al-Mulla<sup>2</sup>

1. Department of Mathematics, Faculty of Sciences, Kuwait University, Kuwait
2. Dasman Diabetes Institute (DDI), Kuwait
3. Department of Medical Laboratory Sciences, Faculty of Allied Health Sciences, Health Sciences Center (HSC), Kuwait University, Kuwait
4. Department of Environmental Health, Harvard T.H. Chan School of Public Health, Harvard University, Boston, MA, United States of America
5. Department of Surgery, Faculty of Medicine, Health Sciences Center (HSC), Kuwait University, Kuwait
6. Department of Surgery, Jaber Al-Ahmad Hospital, Ministry of Health, Kuwait
7. Department of ENT & Head and Neck Surgery, Jaber Al-Ahmad Hospital, Ministry of Health, Kuwait

\*Corresponding author

### Highlights:

1. Kuwait is experiencing a COVID-19 outbreak since the first imported case on Feb 24, 2020.
2. We develop a mathematical model of disease transmission to provide a real-time tracking and forecasting tool for the epidemic outbreak in Kuwait as well as assess the potential epidemic and healthcare burdens and the effectiveness of early control measures.
3. We calibrate the model against daily numbers of detected infection and death cases using a maximum likelihood framework.
4. We find that early control measures had the effect of delaying and lowering the intensity of the outbreak but were unsuccessful in reducing the effective reproduction number below 1.

## **Abstract**

Kuwait has been experiencing a COVID-19 outbreak since the first imported case on Feb 24, 2020. Analysis of data from the early stage of COVID-19 outbreak in Kuwait can provide important information about the potential epidemic and healthcare burdens as well as assist in evaluating the potential impact of various outbreak control measures. Such control measures are essentially implemented to achieve a sufficient reduction in the effective reproduction number during an outbreak. In this study, we use a mathematical modeling framework to simulate the outbreak dynamics of SARS-CoV-2 transmission in Kuwait and forecast the potential burden on the healthcare system. We calibrate the model against daily numbers of detected infection and death cases using a maximum likelihood framework and estimate both the basic and effective reproduction numbers. Our results indicate that the early control measures implemented in Kuwait had the effect of delaying the intensity of the outbreak but were unsuccessful in reducing  $R_t$  below 1. This highlights a need for a systematic investigation of the current public health interventions as well as a scientific surveillance tool that is sufficiently sensitive to outbreak temporal dynamics. Meanwhile, the developed model can serve as a public health tool to control the current outbreak and can be used to anticipate effective measures should a second wave re-emerge in Kuwait.

## Introduction

In early December 2019, a cluster of pneumonia cases of unknown cause were reported in Wuhan, China (1). Later the pathogen was identified and named, Severe Acute Respiratory Syndrome Corona Virus 2 (SARS-CoV2), an enveloped single strand RNA  $\beta$ -coronavirus with a genome of almost 30 thousand bases (2). Since then the virus has been spreading rapidly all over the globe with the World Health Organization (WHO) confirming Corona Virus Disease 2019 (COVID-19) as Pandemic on March 11<sup>th</sup>, 2020. With the number of cases reaching a staggering 3.5 million cases in more than 200 countries and a death toll exceeding 250 thousand (3), coordinated worldwide efforts are needed to prepare healthcare systems to cope with this unprecedented challenge. While some countries showed a degree of resilience and capacity to deal with the progression of COVID-19, in others the burden on healthcare systems was overwhelming leading to catastrophic consequences.

On February 24<sup>th</sup>, Kuwait recorded the first confirmed cases of COVID-19 in four passengers arriving from Iran. Since then, the Ministry of Health have confirmed more than 4000 COVID-19 cases and 26 deaths. Kuwait has implemented gradual control measures in attempt to contain the spread of SARS-CoV2 including: closure of schools, universities, governmental offices and non-essential businesses; full border lockdown, partial curfew and geographic isolation of areas experiencing wide community transmission (Figure 1). The situation in Kuwait was further complicated by a remarkable repatriation operation to bring back more than 50,000 Kuwaiti citizens from around the world by May 7<sup>th</sup>, 2020. The government is implementing home and institutional quarantine measures to limit virus transmission from arrivals. Despite these early and aggressive control measures, community transmission remains observed as manifested by the apparent acceleration of case and death numbers well beyond the anticipated period of slowdown. Hence it is unclear how the outbreak will unfold in the next few months as recent contact-tracing measures highlighted the widening community transmission. In addition, the polymerase chain reaction (PCR) testing seems to be constrained by a global shortage of testing kits and reagents. In anticipation of the unfolding of

such circumstance it becomes necessary to forecast the potential burden it may incur on the local healthcare system.

Forecasting the outbreak dynamics of COVID-19 cases in Kuwait is crucial to estimating, well in advance, the potential burden on the healthcare system. These epidemic outbreak dynamics are typically investigated by employing mathematical models of infectious disease transmission dynamics such as the classic Susceptible-Infective-Recovered (SIR) or Susceptible-Exposed-Infective-Recovered (SEIR) epidemiological models (4-6). Such models play a pivotal role in understanding the epidemic characteristics of an infectious disease outbreak (7), as well as in assessing the impact of various interventions on the spread of the disease (6, 8-11). Indeed, various countries and states are currently using these models to help inform their epidemic containment policies (6). Different generalized versions of these mathematical models can provide more detailed mechanisms for the epidemic dynamics (e.g. mode of transmission, quarantine dynamics, testing scope, and hospitalization dynamics). A widely adopted model for characterizing the epidemic outbreak SARS-CoV-2 is the SEIR model (5). However, under-reporting in daily case numbers poses a significant challenge to understanding the trends associated with COVID-19 progression by public health authorities (12). One way to mitigate the impact of this structural limitation is by fitting a dynamic transmission model to daily numbers of incident cases of infections and reported deaths (13).

In this study, we model the course of the COVID-19 outbreak in Kuwait by developing a generalization of the SEIR model that is informed by two local mechanisms; a delay period during which suspected COVID-19 individuals are tested, identified and hospitalized, and different severity of illness (ranging from recovered asymptomatic to needing critical care). We then calibrate the model by applying a maximum likelihood framework using incident cases of infections and reported deaths (14).

## Methods

### Mathematical Model

We use a deterministic compartmental model for infectious disease transmission with additional compartments to describe the dynamic burden on the healthcare system (Figure 2). Our model simulates SEIR, testing and hospitalization dynamics and can be described by the following set of differential equations:

$$\frac{dS}{dt} = -\frac{\beta(t)SI}{N}$$

$$\frac{dE}{dt} = \frac{\beta(t)SI}{N} - \sigma E$$

$$\frac{dI}{dt} = \sigma E - \gamma I$$

$$\frac{dC}{dt} = f\gamma I - \alpha C$$

$$\frac{dH}{dt} = \alpha C - \omega_1 H$$

$$\frac{dW}{dt} = f_2\alpha_2 H - \alpha_3 W + (1 - f_3)\alpha_5 U$$

$$\frac{dU}{dt} = \epsilon_1\omega_1 H - \epsilon_2\omega_4 U - (1 - \epsilon_2)\omega_2 U$$

$$\frac{dR}{dt} = (1 - f)\gamma I + \omega_3 W$$

$$\frac{dD}{dt} = \epsilon_2\omega_4 U$$

Upon infection, individuals that are susceptible to the virus (S) become exposed but non-infectious carriers (E) and later infectious (I). A fraction of infectious individuals may remain undetected and ultimately enter into a recovered class (R), while the remaining fraction end up being detected (C) by some form of clinical testing or diagnosis. Detected individuals are

sent to hospitals (H) where they are admitted to either an isolation ward (W) or an intensive care unit (U) based on the intensity of their symptoms. Intensive care patients either die (D) or get sent to an isolation ward to stay until full recovery (R).

The progression through the different compartments in our model is characterized by key time periods which describe the dynamic transmission of infection, case detection, patient care and hospitalization, and recovery or death: the average durations of viral latency ( $1/\sigma$ ), carrier infectiousness ( $1/\gamma$ ), onset-to-hospitalization ( $1/\alpha$ ), onset-to-death, hospitalization-to-discharge, and ICU-stay. The fraction of individuals who end up being detected ( $f$ ) is related to the case fatality rate. Since the transmission rate  $\beta$  is affected by the implementation of control measures, we take it as a function of time  $\beta(t) = \beta_0 \kappa(t)$ , where  $\beta_0$  is the transmission rate without control measures (baseline) and  $0 \leq \kappa(t) \leq 1$  is a scaling factor by which interventions reduce the transmission rate. In other words, the lower the value of  $\kappa$  the more effective is the intervention in curbing the epidemic. Here  $\kappa = 1$  indicates an ineffective or absent control measure.

We remark here that due to a lack of detailed data about country demographics and associated person-person contact structure, the current model assumes homogeneous mixing and neither account for age-structure nor the risk associated with comorbidities. Nonetheless, these can be easily incorporated into our model once detailed data become available.

## Data & Parameters

Numbers of confirmed infection and death cases were collected from daily reports from the European Center for Disease Control (15). The key time durations in our model were fixed to values obtained from published datasets as well as unpublished local hospitalization data (Table 1). The mean durations of latency, incubation and infectiousness of SARS-CoV-2 were based on the reported cases from the COVID-19 outbreak in Singapore and Tianjin, China (16).

We assume that a single case started the outbreak on Feb 25, 2020, which coincides with the date of the first reported case of COVID-19 in Kuwait. The total population of Kuwait (N) is about 4,776,000. We note here that our model parameter estimation is insensitive to the number of susceptible individuals as long as the number of cases is small relative to N. We take the initial susceptible population to be 500,000 which is the effective number of individuals who account for the majority of local community transmission in Kuwait. This estimate is consistent with the assumptions that 1) the majority of the population has been protected by the stay-at-home orders, 2) most community transmission cases are localized to certain geographic areas, and 3) children younger than 18 represent a very small percentage of the total number of infected patients. However, we also model 1,500,000 susceptibles and show the corresponding results.

To assess the impact of control interventions, we assume  $\kappa(t) = 1$  prior to the implementation of a partial lockdown on March 22, 2020 (see timeline in Figure 1). We then estimate  $\kappa$  and the baseline transmission rate  $\beta_0$  by employing a maximum likelihood framework (14). To derive the maximum likelihood estimates (MLE) of our unknown parameters we assume the daily numbers of incident infections are detected according to a negative binomial distribution (NBD). We additionally assume the daily number of incident deaths are drawn from a similar distribution. Then optimization was carried out using the Nelder-Mead method (17) on the combined minus log-likelihood function.

The uncertainty of parameters was represented by quantile-based credible intervals (CI). We use the asymptotic normality of MLE to account for such uncertainty through deriving simulation-based 95% CIs for the model curves (18). Simulations were run 10,000 times based on random draws of the unknown model parameters from a normal distribution  $\beta, \kappa \sim N(\hat{\theta}, \Sigma)$ .

Here  $\hat{\theta} = (\widehat{\beta}_0, \widehat{\kappa})$  are maximum likelihood estimates and  $\Sigma$  is the variance-covariance matrix associated with them. Given the parameterization of our transmission model, these parameters permit a model-based estimation of the basic and effective reproduction numbers. In particular, in each simulation run an  $R_0$  value is drawn from a range of values (Table 1) as an initial point to kick start the parameter search algorithm. All such simulations, parameter estimation and model calibration were run in the R software (19).

Our transmission model was fitted to estimate key transmission parameters. The maximum likelihood estimates of the baseline and effective transmission rates,  $\beta_0$  and  $\beta_t$  were used compute the basic and effective reproduction numbers via these formulas

$$R_0 = \frac{\beta_0}{\gamma}, \quad R_t = \kappa R_0.$$



Table 1. Model parameters. Rate of testing and the proportion of cases being tested remain largely unknown at this stage but are expected to increase over time as health authorities increase their laboratory testing capacity. The hospital care data were provided by colleagues from the Ministry of Health, Kuwait.

| Symbol          | Definition                                    | Default Values | Justification    |
|-----------------|-----------------------------------------------|----------------|------------------|
| $N$             | Total population of Kuwait                    | 4,776,000      | PACI, Kuwait     |
| $S_0$           | Susceptible subpopulation                     | 500,000        | MOH, Kuwait      |
| $R_0$           | Basic reproduction number                     | 1.5 – 3.5      | (20)             |
| $\kappa$        | Factor for transmission reduction             | 0.5            |                  |
| $\sigma^{-1}$   | Latent period                                 | 2 days         | (16)             |
| $\gamma^{-1}$   | Infectious period                             | 3.2 days       | (16)             |
| $\alpha^{-1}$   | Onset-to-hospitalization period               | 2 days         | Unpublished data |
| $\omega_1^{-1}$ | Initial hospitalization period                | 6 days         | Unpublished data |
| $\omega_2^{-1}$ | Mean ICU duration until recovery              | 8.5 days       | Unpublished data |
| $\omega_3^{-1}$ | Mean isolation ward duration                  | 10 days        | Unpublished data |
| $\omega_4^{-1}$ | Mean ICU duration until death                 | 10.5 days      | Unpublished data |
| $f$             | Proportion of tested & reported daily cases   | 0.12           | (21)             |
| $\varepsilon_1$ | Proportion of patients admitted to ICU        | 0.075          | Unpublished data |
| $\varepsilon_2$ | Proportion of ICU patients with death outcome | 0.25           | Unpublished data |
| CFR             | Case fatality ratio                           | 1.4%           | (12)             |

## Results

Our estimated basic reproduction number is  $R_0 = 1.43$  (95% CI: 1.33–1.58). Interestingly, the MLE of the factor by which control measures reduce transmission was estimated at  $\kappa = 1$  (95% CI: 0.9998–1). This corresponds to an effective reproduction number  $\beta_t = \beta_0$ , which is consistent with reports from the Centre for Mathematical Modelling of Infectious Diseases (22).

Table 2. Projected epidemic and healthcare burdens. Burden projections based on model simulations are presented. Uncertainty is represented by with 95% credible intervals.

| Expected Burden        | 500,000 Susceptibles | 1,500,000 Susceptibles |
|------------------------|----------------------|------------------------|
| Max reported cases     | 480 (300–680)        | 1400 (800–2000)        |
| Max hospital occupancy | 8000 (5000–12000)    | 25000 (15000–35000)    |
| Max ICU occupancy      | 350 (220–480)        | 1000 (600–1400)        |
| Max daily mortality    | 8 (5–12)             | 24 (15–33)             |
| Peak time-window       | 15 May – 3 June      | 1 June – 20 June       |

We remark here that our model-based estimates of the reproduction numbers, which directly influence the prevalence of the epidemic, depend on the values we adopt for the incubation and infectious periods (Table 1). In particular, larger periods are expected to lead to higher values for the reproduction numbers. For example, we find  $R_t = R_0 = 1.97$  (95% CI: 1.85–2.12) if we change the incubation and infectious periods to 5 and 6 days, respectively.

Our parameter estimations captured the variation around the observed number of reported cases and deaths to project a posterior distribution of the expected numbers. Our projected trajectories and their 95% credible intervals were able to capture the early slow increase in observed cases, hospitalization and deaths (Figure 3).

Under the current testing rate, capacity and scope, the model projects the daily numbers of reported cases to peak around 480 (95% CI: 300–680) by the second half of the month of May. In terms of the burden on the healthcare system, our model projects peak hospital admission of 8000 patients (95% CI: 5000–12000) with ICUs projected to peak around 350 patients (95% CI: 220–480). At these rates the model projects a peak daily mortality around 8 deaths (95% CI: 5–12). We additionally explored a scenario that simulates an

expansion in the size of the susceptible subpopulation by a factor of three. A summary of the projected epidemic and healthcare burdens is presented in Table 2.

## Discussion

We developed a mathematical modeling framework for real-time tracking and forecasting of the epidemic outbreak of COVID19 in Kuwait and the associated burden on the healthcare system. This quantitative framework is further employed to evaluate how the control measures implemented in Kuwait may have influenced the epidemic burden.

Our results suggest that the early gradual and aggressive control measures in Kuwait had the effect of delaying and lowering the intensity of the outbreak by protecting a large fraction of the population. Despite that fact that the country has been under lockdown since March 22<sup>nd</sup>, 2020, our model indicates that the effective reproduction number ( $R_t$ ) remained unchanged. In principle, such control measures are implemented to achieve a sufficient reduction in the effective reproduction number during an outbreak. This may be explained by the reported outbreaks amongst migrant workers. Kuwait has a considerably heterogeneous population with 60% comprised of migrant workers. A large proportion of these workers cluster in certain areas and live in cramped dormitories with poor and unsanitary housing conditions. Aggressive social distancing measures may not be implementable nor have the same effect on these subpopulations. Hence, this could exacerbate the transmission of the infection in the presence of lockdowns. It is therefore imperative, for the epidemiological understanding of the disease distribution, to perform demographic studies that aim to extract contact structure matrices and establish how different control measures may or may not affect heterogeneous transmission rates (23). This is not only applicable to the State of Kuwait, but also the Arabian Gulf states, Singapore and other countries with somewhat similar demographic profiles.

Additionally, our results indicate that the COVID-19 outbreak in Kuwait is on course to accelerate further in the next few weeks, which is consistent with the recent trends associated with expanded testing and contact tracing. Indeed, our model analysis of the projected epidemic trend indicates that hospitals may need to prepare for admitting around 12000 patients of which 500 may need critical care.

## **Conclusions**

COVID-19 poses significant public health challenges to many countries including Kuwait. We have shown that aggressive control measure can effectively delay and lower the intensity of the outbreak. However, they might not be sufficient to completely halt the transmission of the disease in the presence of certain structural restrictions. In turn, this highlights an urgent need for a systematic reassessment of public health interventions to account for demographic heterogeneities. Such an assessment needs to be supported by a scientific surveillance tool that is sufficiently sensitive to outbreak temporal dynamics. In particular, our model can serve as a public health tool for decision makers to guide in the control of the current outbreak. This tool can also be used to anticipate effective future measures should a second wave re-emerge in Kuwait.

## **Acknowledgments**

The authors would like to thank Fatima Khudada from the Department of Medicine (University of Toronto) for helpful comments on the manuscript, and Saud Alzaid from the Department of Surgery (Kuwait University) for valuable input in the formulation of the ICU dynamics of the model.

## References

1. Huang C, Wang Y, Li X, Ren L, Zhao J, Hu Y, et al. Clinical features of patients infected with 2019 novel coronavirus in Wuhan, China. *Lancet*. 2020;395(10223):497-506.
2. Wu F, Zhao S, Yu B, Chen YM, Wang W, Song ZG, et al. A new coronavirus associated with human respiratory disease in China. *Nature*. 2020;579(7798):265-9.
3. Dong E, Du H, Gardner L. An interactive web-based dashboard to track COVID-19 in real time. *Lancet Infect Dis*. 2020.
4. Legrand J, Grais RF, Boelle PY, Valleron AJ, Flahault A. Understanding the dynamics of Ebola epidemics. *Epidemiol Infect*. 2007;135(4):610-21.
5. Kucharski AJ, Russell TW, Diamond C, Liu Y, Edmunds J, Funk S, et al. Early dynamics of transmission and control of COVID-19: a mathematical modelling study. *Lancet Infect Dis*. 2020.
6. Ferguson NM, Cummings DA, Cauchemez S, Fraser C, Riley S, Meeyai A, et al. Strategies for containing an emerging influenza pandemic in Southeast Asia. *Nature*. 2005;437(7056):209-14.
7. Camacho A, Kucharski A, Aki-Sawyer Y, White MA, Flasche S, Baguelin M, et al. Temporal Changes in Ebola Transmission in Sierra Leone and Implications for Control Requirements: a Real-time Modelling Study. *PLoS Curr*. 2015;7.
8. Funk S, Ciglenecki I, Tiffany A, Gignoux E, Camacho A, Eggo RM, et al. The impact of control strategies and behavioural changes on the elimination of Ebola from Lofa County, Liberia. *Philos Trans R Soc Lond B Biol Sci*. 2017;372(1721).
9. Riley S, Fraser C, Donnelly CA, Ghani AC, Abu-Raddad LJ, Hedley AJ, et al. Transmission dynamics of the etiological agent of SARS in Hong Kong: impact of public health interventions. *Science*. 2003;300(5627):1961-6.
10. Viboud C, Sun K, Gaffey R, Ajelli M, Fumanelli L, Merler S, et al. The RAPIDD ebola forecasting challenge: Synthesis and lessons learnt. *Epidemics*. 2018;22:13-21.
11. Kucharski AJ, Camacho A, Checchi F, Waldman R, Grais RF, Cabrol JC, et al. Evaluation of the benefits and risks of introducing Ebola community care centers, Sierra Leone. *Emerg Infect Dis*. 2015;21(3):393-9.
12. Russell TW, Hellewell J, Jarvis CI, van Zandvoort K, Abbott S, Ratnayake R, et al. Estimating the infection and case fatality ratio for coronavirus disease (COVID-19) using age-adjusted data from the outbreak on the Diamond Princess cruise ship, February 2020. *Euro Surveill*. 2020;25(12).
13. Althaus CL, Low N, Musa EO, Shuaib F, Gsteiger S. Ebola virus disease outbreak in Nigeria: Transmission dynamics and rapid control. *Epidemics*. 2015;11:80-4.
14. Bolker BM. *Ecological Models and Data in R*: Princeton University Press; 2008.
15. The Geographic Distribution of COVID-19 Cases Worldwide [Internet]. 2020 [cited May 3rd, 2020]. Available from: <https://www.ecdc.europa.eu>.
16. Ganyani T, Kremer C, Chen D, Torneri A, Faes C, Wallinga J, et al. Estimating the generation interval for COVID-19 based on symptom onset data. *medRxiv*. 2020:2020.03.05.20031815.
17. Nelder JA, Mead R. A Simplex Method for Function Minimization. *The Computer Journal*. 1965;7(4):308-13.
18. Mandel M. Simulation-Based Confidence Intervals for Functions With Complicated Derivatives. *The American Statistician*. 2013;67(2):76-81.
19. R Development Core Team. *R: A Language and Environment for Statistical Computing*. Vienna, Austria R Foundation for Statistical Computing; 2014.

20. Ferguson N, Laydon D, Nedjati Gilani G, Imai N, Ainslie K, Baguelin M, et al. Report 9: Impact of non-pharmaceutical interventions (NPIs) to reduce COVID19 mortality and healthcare demand. Faculty of Medicine, School of Public Health, Imperial College London COVID-19; 2020 16-Mar-2020.
21. Anderson SC, Edwards AM, Yerlanov M, Mulberry N, Stockdale J, Iyaniwura SA, et al. Estimating the impact of COVID-19 control measures using a Bayesian model of physical distancing. medRxiv. 2020:2020.04.17.20070086.
22. Abbott S, Hellewell J, Munday J, Chun J, Thompson R, Bosse N, et al. Temporal variation in transmission during the COVID-19 outbreak. 2020 04-04-2020.
23. Beraud G, Kazmerczak S, Beutels P, Levy-Bruhl D, Lenne X, Mielcarek N, et al. The French Connection: The First Large Population-Based Contact Survey in France Relevant for the Spread of Infectious Diseases. PLoS One. 2015;10(7):e0133203.

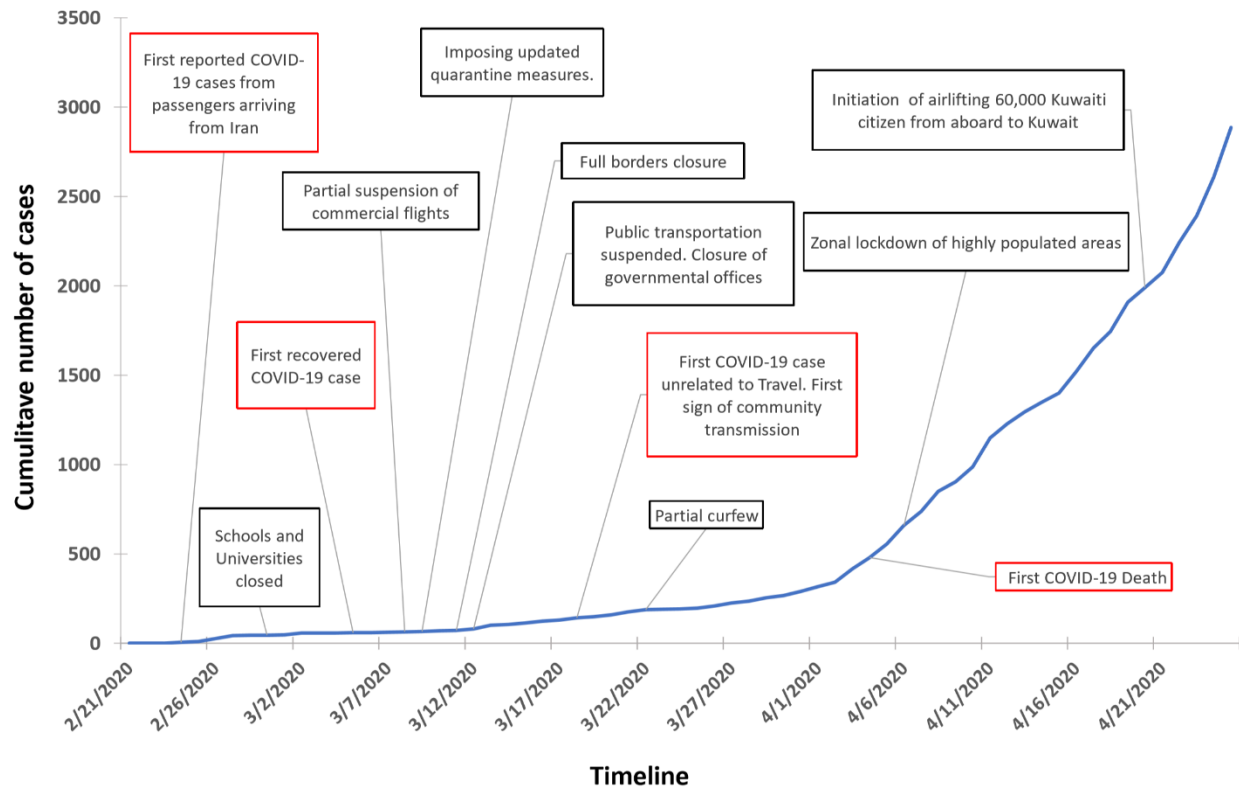

**Figure 1.** Cumulative number of reported COVID-19 cases in Kuwait along with a timeline of events.

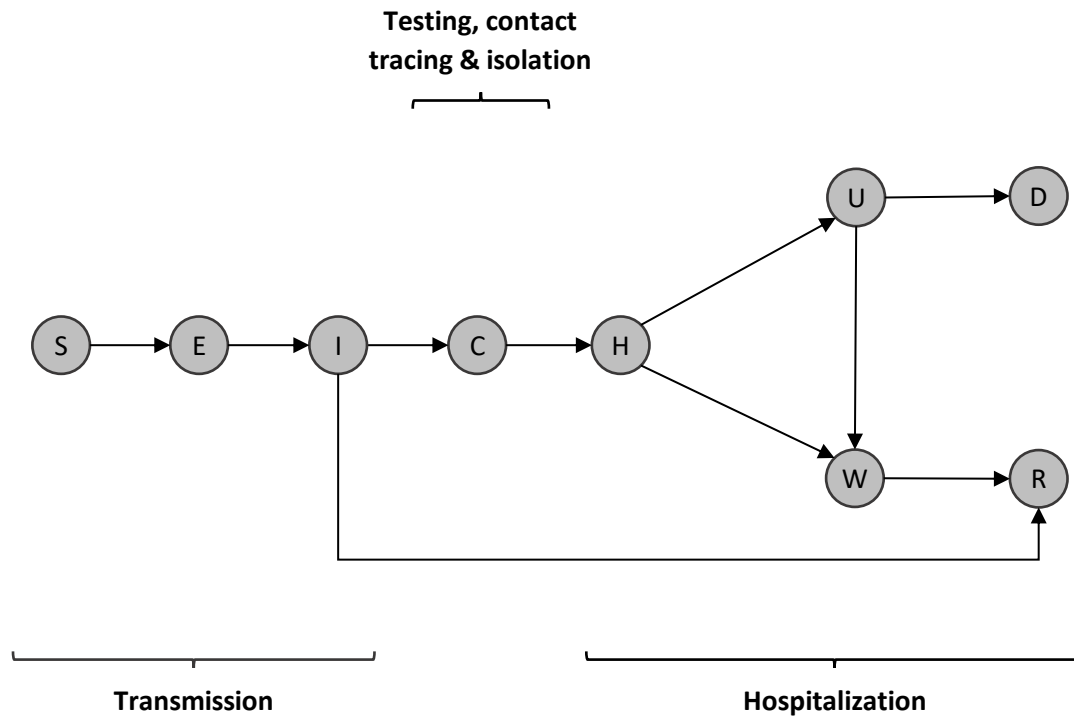

**Figure 2.** Schematic diagram of the CoVID-19 transmission model. Individuals (S) susceptible to the virus become infected by infectious individuals (I) at rate. They then move through a latent period (E) at rate before becoming infectious (I). Infectious individuals can either move through a detection period (C) at a rate or eventually recover without symptoms at a rate. Confirmed infectious individuals move through an initial hospitalization period (H) at a rate after which they are admitted to either an isolation ward (W) at a rate or an intensive care unit (U) at a rate. Intensive care patients may recover and be sent to an isolation ward W at a rate or ultimately die (D) at a rate. Isolated patients move through a recovery period (R) at a rate, where they are assumed to be immune to the disease, at least in the medium term.



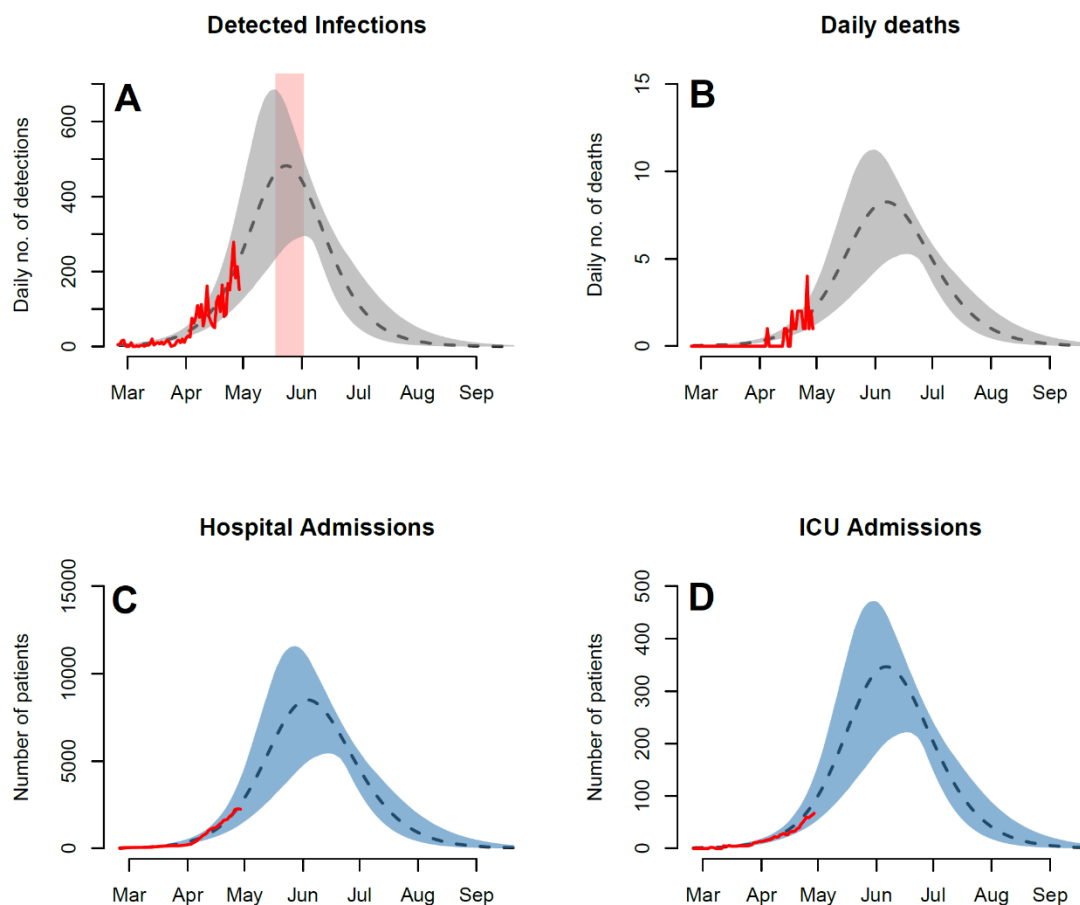

**Figure 3.** Observed and forecasted trajectories assuming 500,000 susceptibles. Observed and projected daily numbers of A) incident infections, B) death cases, C) general hospital admissions and D) ICU admissions. Red rectangular ribbon highlights the projected time-window of the epidemic peak. Red lines represent the reported data. Black dashed lines represent model projections based on MLE of unknown parameters with shaded ribbons representing 95% credible interval on new observations. We note here that the observed cases and their projections only represent a fraction of the actual and model prevalence. This is based on our assumption of under-reporting and the presence of asymptomatic individuals in the population.

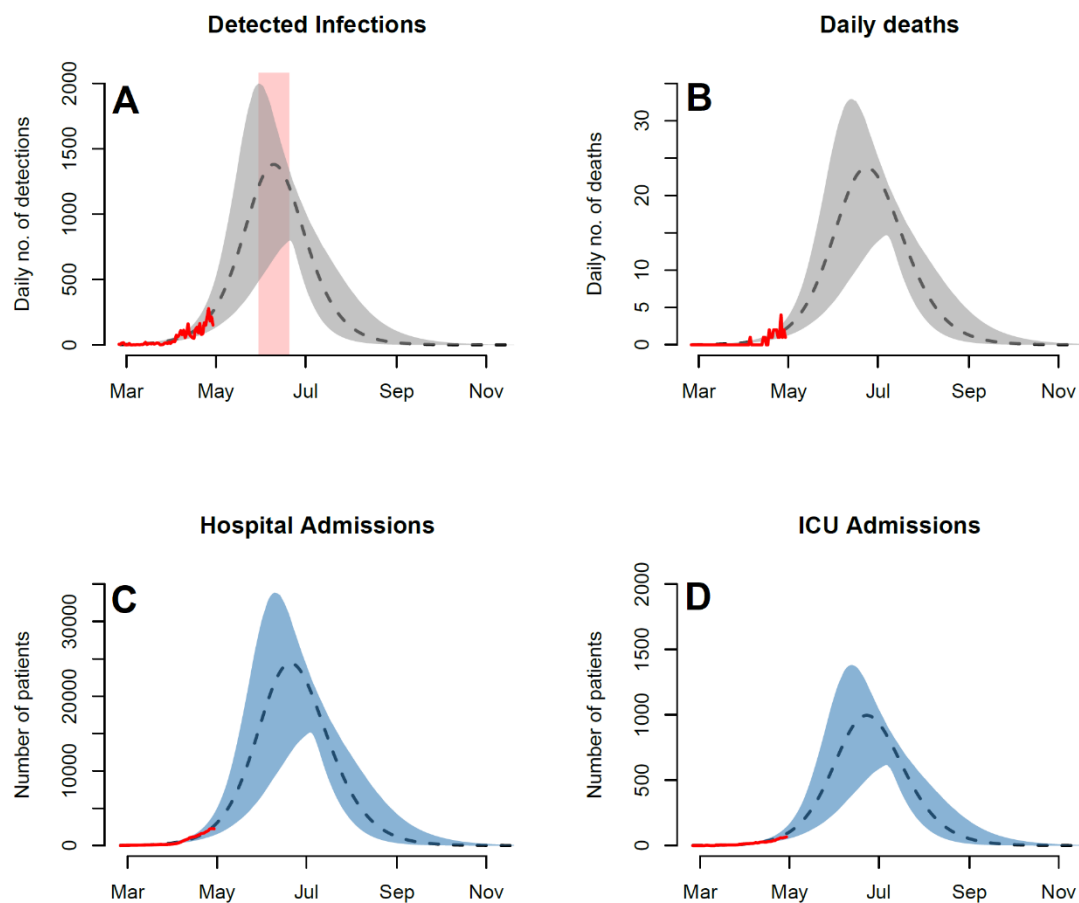

**Figure 4.** Tripling the size of the susceptible population. Peaks of forecasted trajectories are approximately tripled in size. The projected time-window of the peak is delayed by 2-weeks and widened (3-week period). Observed and projected daily numbers of A) incident infections, B) death cases, C) general hospital admissions and D) ICU admissions. Red rectangular ribbon highlights the projected time-window of the epidemic peak. Red lines represent the reported data. Black dashed lines represent model projections based on MLE of unknown parameters with shaded ribbons representing 95% credible interval on new observations. We note here that the observed cases and their projections only represent a fraction of the actual and model prevalence. This is based on our assumption of under-reporting and the presence of asymptomatic individuals in the population.
